# Supplementary material
Source: publisher site journal article supplement (https://www.spandidos-publications.com/6950/downloadSupplementary)
Supplement: Supplementary file 1 [file downloadSupplementary]

## Sheet: LGALS1
Table SVI, Real Time PCR LGALS1, ITGA4, HGF and RHOC
Sample no.	Sample name	Ct value of the LGALS1 gene	Mean gene Ct value	Ct value of GAPDH internal reference gene	Mean Ct value of internal reference gene	Ct value of target gene - Ct value of internal reference gene	Ct value of target gene in control sample - Ct value of reference gene in control sample	(Ct value of the target gene in the sample to be tested - Ct value of the reference gene in the sample to be tested) - (Ct value of the target gene in the control sample - Ct value of the reference gene in the control sample)	2△△Ct	2-△△Ct		Sample no.	Normal	Turmor
1	Normal 1	21.0044	20.9225	18.5533	18.4009	2.52163	2.52163	0	1	1		1	1	0.145615		Key
2	Normal 1	20.8407		18.2485								2	1.37901	1.22066		Large number
3	Normal 2	20.6065	20.5849	18.5531	18.5269	2.058	2.52163	-0.463634	0.725157	1.37901		3	1.23252	1.77267
4	Normal 2	20.5633		18.5007								4	1.21022	0.466002		Small number
5	Normal 3	20.1503	20.2286	18.0022	18.0085	2.22003	2.52163	-0.301606	0.811348	1.23252		5	2.10788	0.196375
6	Normal 3	20.3068		18.0149								6	1.77134	1.32779
7	Normal 4	20.4616	20.5263	18.2725	18.28	2.24637	2.52163	-0.275268	0.826297	1.21022		7	0.808981	0.7153
8	Normal 4	20.591		18.2874								8	0.950017	1.34141
9	Normal 5	19.7194	19.6188	18.2407	18.1729	1.44584	2.52163	-1.07579	0.474411	2.10788		9	1.82485	1.48885
10	Normal 5	19.5182		18.1051								10	1.67104	1.52873
11	Normal 6	19.9339	19.9222	18.2265	18.2254	1.69679	2.52163	-0.824842	0.564544	1.77134		11	1.38933	0.593067
12	Normal 6	19.9106		18.2244								12	1.79889	1.66827
13	Normal 7	21.4018	21.3854	18.6803	18.558	2.82746	2.52163	0.305822	1.23612	0.808981		13	1.50281	0.658871
14	Normal 7	21.3691		18.4356								14	1.89684	1.86612
15	Normal 8	21.0353	20.9908	18.3224	18.3952	2.59561	2.52163	0.0739744	1.05261	0.950017		15	1.49382	0.266738
16	Normal 8	20.9463		18.468								16	1.94432	0.316178
17	Normal 9	19.7677	19.8095	18.0769	18.1556	1.65386	2.52163	-0.867776	0.547991	1.82485		17	1.04874	1.45433
18	Normal 9	19.8513		18.2344								18	1.19959	0.377235
19	Normal 10	20.6165	20.7528	18.9841	18.9719	1.78089	2.52163	-0.740749	0.598429	1.67104		19	1.60706	1.40017
20	Normal 10	20.889		18.9596								20	0.960152	2.02641
21	Normal 11	20.4371	20.6218	18.7188	18.5746	2.04724	2.52163	-0.474392	0.71977	1.38933		Average	1.43987	1.04154
22	Normal 11	20.8065		18.4304								Standard deviation	0.381069	0.623556
23	Normal 12	20.018	20.1711	18.3608	18.4966	1.67453	2.52163	-0.847104	0.555899	1.79889
24	Normal 12	20.3243		18.6324
25	Normal 13	20.9726	20.7452	18.8469	18.8112	1.93398	2.52163	-0.587659	0.665422	1.50281
26	Normal 13	20.5177		18.7756
27	Normal 14	20.1788	20.2605	18.5543	18.6625	1.59803	2.52163	-0.923599	0.527192	1.89684
28	Normal 14	20.3423		18.7707
29	Normal 15	20.8868	20.9771	19.0977	19.0345	1.94263	2.52163	-0.579006	0.669425	1.49382
30	Normal 15	21.0674		18.9713
31	Normal 16	20.6758	20.7032	19.0656	19.1408	1.56237	2.52163	-0.959264	0.514319	1.94432
32	Normal 16	20.7306		19.2161
33	Normal 17	21.7413	21.6692	19.3486	19.2162	2.45297	2.52163	-0.0686619	0.953522	1.04874
34	Normal 17	21.5971		19.0839
35	Normal 18	20.7271	20.7387	18.4675	18.4797	2.25909	2.52163	-0.262546	0.833616	1.19959
36	Normal 18	20.7504		18.4918
37	Normal 19	20.242	20.3094	18.5457	18.4722	1.83721	2.52163	-0.684426	0.622253	1.60706
38	Normal 19	20.3768		18.3986
39	Normal 20	21.0999	21.0114	18.3301	18.4311	2.5803	2.52163	0.0586651	1.0415	0.960152
40	Normal 20	20.9229		18.5321
41	Turmor 1	25.9935	26.0352	20.634	20.7338	5.3014	2.52163	2.77976	6.8674	0.145615
42	Turmor 1	26.0768		20.8335
43	Turmor 2	21.5427	21.3226	19.025	19.0886	2.23397	2.52163	-0.287662	0.819229	1.22066
44	Turmor 2	21.1024		19.1522
45	Turmor 3	18.2651	18.4062	16.8796	16.7105	1.69571	2.52163	-0.825921	0.564122	1.77267
46	Turmor 3	18.5473		16.5414
47	Turmor 4	23.7081	23.635	19.9764	20.0118	3.62323	2.52163	1.10159	2.14591	0.466002
48	Turmor 4	23.562		20.0472
49	Turmor 5	24.2324	24.2307	19.2183	19.3607	4.86995	2.52163	2.34832	5.0923	0.196375
50	Turmor 5	24.2289		19.5031
51	Turmor 6	18.2655	18.3111	16.1794	16.1985	2.1126	2.52163	-0.409032	0.753128	1.32779
52	Turmor 6	18.3566		16.2175
53	Turmor 7	22.7636	22.7297	19.9506	19.7247	3.00501	2.52163	0.483379	1.39801	0.7153
54	Turmor 7	22.6958		19.4988
55	Turmor 8	20.9927	20.9793	18.8633	18.8814	2.09788	2.52163	-0.423753	0.745483	1.34141
56	Turmor 8	20.9658		18.8995
57	Turmor 9	21.7291	21.7272	19.7004	19.7797	1.94744	2.52163	-0.574196	0.67166	1.48885
58	Turmor 9	21.7253		19.8591
59	Turmor 10	22.5655	22.6269	20.6214	20.7176	1.9093	2.52163	-0.612331	0.654139	1.52873
60	Turmor 10	22.6883		20.8138
61	Turmor 11	23.4272	23.4483	20.5175	20.173	3.27537	2.52163	0.753733	1.68615	0.593067
62	Turmor 11	23.4695		19.8284
63	Turmor 12	22.0998	22.3283	20.4514	20.5451	1.78329	2.52163	-0.738349	0.599425	1.66827
64	Turmor 12	22.5569		20.6387
65	Turmor 13	22.9461	23.0244	19.7658	19.9008	3.12357	2.52163	0.601931	1.51775	0.658871
66	Turmor 13	23.1027		20.0358
67	Turmor 14	17.7029	17.7662	16.1115	16.1446	1.62159	2.52163	-0.90004	0.535872	1.86612
68	Turmor 14	17.8295		16.1778
69	Turmor 15	24.2122	24.2037	19.7612	19.7755	4.42814	2.52163	1.90651	3.749	0.266738
70	Turmor 15	24.1952		19.7899
71	Turmor 16	25.5595	25.7824	21.6085	21.5996	4.18283	2.52163	1.66119	3.16278	0.316178
72	Turmor 16	26.0054		21.5907
73	Turmor 17	21.7703	21.8637	19.9365	19.8824	1.98128	2.52163	-0.54035	0.687604	1.45433
74	Turmor 17	21.9571		19.8284
75	Turmor 18	18.8849	18.7912	14.944	14.8631	3.9281	2.52163	1.40646	2.65087	0.377235
76	Turmor 18	18.6974		14.7821
77	Turmor 19	21.3792	21.363	19.2542	19.327	2.03603	2.52163	-0.485603	0.714199	1.40017
78	Turmor 19	21.3469		19.3998
79	Turmor 20	20.9766	21.0527	19.3913	19.55	1.50271	2.52163	-1.01893	0.493483	2.02641
80	Turmor 20	21.1287		19.7087

## Sheet: ITGA4
Table SV, Real Time PCR LGALS1, ITGA4, HGF and RHOC
Sample no.	Sample name	Ct value of the ITGA4 gene	Mean gene Ct value	Ct value of GAPDH internal reference gene	Mean Ct value of internal reference gene	Ct value of target gene - Ct value of internal reference gene	Ct value of target gene in control sample - Ct value of reference gene in control sample	(Ct value of the target gene in the sample to be tested - Ct value of the reference gene in the sample to be tested) - (Ct value of the target gene in the control sample - Ct value of the reference gene in the control sample)	2△△Ct	2-△△Ct		Sample	Normal	Turmor
1	Normal 1	19.668	19.6033	18.5533	18.4009	1.20243	1.20243	0	1	1		1	1	0.749699		Key
2	Normal 1	19.5387		18.2485								2	1.06106	1.68326		large number
3	Normal 2	19.7078	19.6438	18.5531	18.5269	1.11692	1.20243	-0.0855055	0.942454	1.06106		3	0.876317	0.423656
4	Normal 2	19.5799		18.5007								4	1.31937	1.24475		small number
5	Normal 3	19.3249	19.4014	18.0022	18.0085	1.3929	1.20243	0.190475	1.14114	0.876317		5	1.2974	3.46474
6	Normal 3	19.4779		18.0149								6	0.967286	0.583846
7	Normal 4	19.2525	19.0825	18.2725	18.28	0.802577	1.20243	-0.399849	0.757938	1.31937		7	1.55442	1.62541
8	Normal 4	18.9126		18.2874								8	1.02617	1.58906
9	Normal 5	18.8596	18.9997	18.2407	18.1729	0.826808	1.20243	-0.375618	0.770775	1.2974		9	1.15076	0.948272
10	Normal 5	19.1398		18.1051								10	1.05213	1.0428
11	Normal 6	19.5192	19.4758	18.2265	18.2254	1.25041	1.20243	0.047986	1.03382	0.967286		11	1.08536	0.733869
12	Normal 6	19.4325		18.2244								12	0.63103	1.36711
13	Normal 7	19.1252	19.124	18.6803	18.558	0.566052	1.20243	-0.636374	0.643328	1.55442		13	0.992213	1.47118
14	Normal 7	19.1229		18.4356								14	0.769297	0.296442
15	Normal 8	19.4752	19.5603	18.3224	18.3952	1.16515	1.20243	-0.0372753	0.974494	1.02617		15	0.754474	2.55733
16	Normal 8	19.6455		18.468								16	0.855857	3.81557
17	Normal 9	19.1657	19.1555	18.0769	18.1556	0.999843	1.20243	-0.202583	0.868993	1.15076		17	1.09185	2.38087
18	Normal 9	19.1452		18.2344								18	1.08568	0.305923
19	Normal 10	20.1829	20.101	18.9841	18.9719	1.12912	1.20243	-0.073307	0.950457	1.05213		19	0.797162	1.59996
20	Normal 10	20.0191		18.9596								20	0.810239	1.85869
21	Normal 11	19.8947	19.6588	18.7188	18.5746	1.08425	1.20243	-0.118174	0.921353	1.08536		Average	1.0089	1.48712
22	Normal 11	19.4229		18.4304								Standard deviation	0.219228	0.971373
23	Normal 12	20.3224	20.3633	18.3608	18.4966	1.86664	1.20243	0.664219	1.58471	0.63103
24	Normal 12	20.4041		18.6324
25	Normal 13	20.1143	20.0249	18.8469	18.8112	1.2137	1.20243	0.0112776	1.00785	0.992213
26	Normal 13	19.9356		18.7756
27	Normal 14	20.2409	20.2433	18.5543	18.6625	1.58081	1.20243	0.378386	1.29989	0.769297
28	Normal 14	20.2458		18.7707
29	Normal 15	20.6549	20.6433	19.0977	19.0345	1.60888	1.20243	0.406456	1.32543	0.754474
30	Normal 15	20.6318		18.9713
31	Normal 16	20.513	20.5678	19.0656	19.1408	1.42698	1.20243	0.224558	1.16842	0.855857
32	Normal 16	20.6226		19.2161
33	Normal 17	20.4036	20.2919	19.3486	19.2162	1.07565	1.20243	-0.126773	0.915878	1.09185
34	Normal 17	20.1802		19.0839
35	Normal 18	19.5343	19.5635	18.4675	18.4797	1.08382	1.20243	-0.118604	0.921079	1.08568
36	Normal 18	19.5927		18.4918
37	Normal 19	19.9808	20.0017	18.5457	18.4722	1.52948	1.20243	0.327056	1.25445	0.797162
38	Normal 19	20.0225		18.3986
39	Normal 20	19.8807	19.9371	18.3301	18.4311	1.50601	1.20243	0.30358	1.2342	0.810239
40	Normal 20	19.9935		18.5321
41	Turmor 1	22.2956	22.3518	20.634	20.7338	1.61804	1.20243	0.415616	1.33387	0.749699
42	Turmor 1	22.4081		20.8335
43	Turmor 2	19.6318	19.5398	19.025	19.0886	0.451167	1.20243	-0.751259	0.594085	1.68326
44	Turmor 2	19.4478		19.1522
45	Turmor 3	19.0465	19.1519	16.8796	16.7105	2.44146	1.20243	1.23903	2.3604	0.423656
46	Turmor 3	19.2574		16.5414
47	Turmor 4	20.7875	20.8984	19.9764	20.0118	0.886576	1.20243	-0.31585	0.803377	1.24475
48	Turmor 4	21.0093		20.0472
49	Turmor 5	18.5492	18.7704	19.2183	19.3607	-0.590321	1.20243	-1.79275	0.288622	3.46474
50	Turmor 5	18.9917		19.5031
51	Turmor 6	17.9607	18.1772	16.1794	16.1985	1.97877	1.20243	0.776341	1.71278	0.583846
52	Turmor 6	18.3937		16.2175
53	Turmor 7	20.3092	20.2263	19.9506	19.7247	0.50162	1.20243	-0.700806	0.615229	1.62541
54	Turmor 7	20.1434		19.4988
55	Turmor 8	19.4922	19.4156	18.8633	18.8814	0.534253	1.20243	-0.668173	0.629303	1.58906
56	Turmor 8	19.339		18.8995
57	Turmor 9	20.8976	21.0588	19.7004	19.7797	1.27905	1.20243	0.0766268	1.05455	0.948272
58	Turmor 9	21.22		19.8591
59	Turmor 10	21.7849	21.8596	20.6214	20.7176	1.14197	1.20243	-0.0604563	0.958961	1.0428
60	Turmor 10	21.9343		20.8138
61	Turmor 11	22.011	21.8218	20.5175	20.173	1.64883	1.20243	0.446406	1.36264	0.733869
62	Turmor 11	21.6326		19.8284
63	Turmor 12	21.1171	21.2964	20.4514	20.5451	0.751296	1.20243	-0.45113	0.73147	1.36711
64	Turmor 12	21.4756		20.6387
65	Turmor 13	20.4146	20.5463	19.7658	19.9008	0.64545	1.20243	-0.556976	0.679725	1.47118
66	Turmor 13	20.6779		20.0358
67	Turmor 14	19.0861	19.1012	16.1115	16.1446	2.9566	1.20243	1.75418	3.37334	0.296442
68	Turmor 14	19.1164		16.1778
69	Turmor 15	19.5632	19.6233	19.7612	19.7755	-0.152214	1.20243	-1.35464	0.391032	2.55733
70	Turmor 15	19.6835		19.7899
71	Turmor 16	20.7898	20.8701	21.6085	21.5996	-0.729474	1.20243	-1.9319	0.262084	3.81557
72	Turmor 16	20.9504		21.5907
73	Turmor 17	19.7215	19.8334	19.9365	19.8824	-0.0490608	1.20243	-1.25149	0.420015	2.38087
74	Turmor 17	19.9452		19.8284
75	Turmor 18	17.6917	17.7743	14.944	14.8631	2.91118	1.20243	1.70876	3.26879	0.305923
76	Turmor 18	17.8568		14.7821
77	Turmor 19	19.8781	19.8514	19.2542	19.327	0.524389	1.20243	-0.678037	0.625015	1.59996
78	Turmor 19	19.8247		19.3998
79	Turmor 20	19.8707	19.8581	19.3913	19.55	0.308142	1.20243	-0.894284	0.538014	1.85869
80	Turmor 20	19.8455		19.7087

## Sheet: HGF
Table SV, Real Time PCR LGALS1, ITGA4, HGF and RHOC
Sample no.	Sample name	Ct value of the HGF gene	Mean gene Ct value	Ct value of GAPDH internal reference gene	Mean Ct value of internal reference gene	Ct value of target gene - Ct value of internal reference gene	Ct value of target gene in control sample - Ct value of reference gene in control sample	(Ct value of the target gene in the sample to be tested - Ct value of the reference gene in the sample to be tested) - (Ct value of the target gene in the control sample - Ct value of the reference gene in the control sample)	2△△Ct	2-△△Ct		Sample	Normal	Turmor
1	Normal 1	20.0384	19.9775	18.5533	18.4009	1.57655	1.57655	0	1	1		1	1	0.732401
2	Normal 1	19.9165		18.2485								2	0.330805	0.305794
3	Normal 2	21.6301	21.6994	18.5531	18.5269	3.17249	1.57655	1.59595	3.02293	0.330805		3	0.301718	0.641924		Key
4	Normal 2	21.7687		18.5007								4	0.293484	1.22212		large number
5	Normal 3	21.2631	21.3138	18.0022	18.0085	3.30527	1.57655	1.72873	3.31436	0.301718		5	0.605325	4.32337
6	Normal 3	21.3646		18.0149								6	0.328955	0.49896		small number
7	Normal 4	21.6159	21.6251	18.2725	18.28	3.34519	1.57655	1.76864	3.40734	0.293484		7	0.250865	1.33392
8	Normal 4	21.6344		18.2874								8	0.609213	0.756463
9	Normal 5	20.5805	20.4737	18.2407	18.1729	2.30076	1.57655	0.724217	1.652	0.605325		9	0.343986	0.618576
10	Normal 5	20.3668		18.1051								10	0.363729	0.588744
11	Normal 6	21.4572	21.406	18.2265	18.2254	3.18058	1.57655	1.60404	3.03993	0.328955		11	0.608545	0.356725
12	Normal 6	21.3548		18.2244								12	0.179462	0.941045
13	Normal 7	22.0614	22.1295	18.6803	18.558	3.57156	1.57655	1.99502	3.9862	0.250865		13	0.19245	1.36498
14	Normal 7	22.1977		18.4356								14	0.0100202	0.0782909
15	Normal 8	20.4675	20.6867	18.3224	18.3952	2.29153	1.57655	0.714981	1.64146	0.609213		15	0.0993856	3.72393
16	Normal 8	20.9059		18.468								16	0.0475813	1.31102
17	Normal 9	21.1517	21.2718	18.0769	18.1556	3.11612	1.57655	1.53958	2.90709	0.343986		17	0.117022	0.465625
18	Normal 9	21.3919		18.2344								18	0.233497	0.0592718
19	Normal 10	21.8948	22.0075	18.9841	18.9719	3.03561	1.57655	1.45906	2.7493	0.363729		19	0.151522	1.84537
20	Normal 10	22.1202		18.9596								20	0.201698	2.03142
21	Normal 11	20.8265	20.8677	18.7188	18.5746	2.29311	1.57655	0.716565	1.64326	0.608545		Average	0.313463	1.16
22	Normal 11	20.9089		18.4304								Standard deviation	0.236689	1.12076
23	Normal 12	22.4431	22.5514	18.3608	18.4966	4.05479	1.57655	2.47825	5.5722	0.179462
24	Normal 12	22.6597		18.6324
25	Normal 13	22.6442	22.7652	18.8469	18.8112	3.95399	1.57655	2.37745	5.19616	0.19245
26	Normal 13	22.8863		18.7756
27	Normal 14	26.829	26.88	18.5543	18.6625	8.21748	1.57655	6.64094	99.7979	0.0100202
28	Normal 14	26.931		18.7707
29	Normal 15	24.3507	23.9418	19.0977	19.0345	4.90737	1.57655	3.33082	10.0618	0.0993856
30	Normal 15	23.533		18.9713
31	Normal 16	24.9451	25.1108	19.0656	19.1408	5.97001	1.57655	4.39346	21.0166	0.0475813
32	Normal 16	25.2766		19.2161
33	Normal 17	23.9688	23.8879	19.3486	19.2162	4.67169	1.57655	3.09514	8.54537	0.117022
34	Normal 17	23.8071		19.0839
35	Normal 18	22.0922	22.1547	18.4675	18.4797	3.67507	1.57655	2.09853	4.28272	0.233497
36	Normal 18	22.2172		18.4918
37	Normal 19	22.6056	22.7711	18.5457	18.4722	4.29894	1.57655	2.7224	6.59969	0.151522
38	Normal 19	22.9366		18.3986
39	Normal 20	22.1317	22.3174	18.3301	18.4311	3.88628	1.57655	2.30973	4.9579	0.201698
40	Normal 20	22.503		18.5321
41	Turmor 1	22.6112	22.7596	20.634	20.7338	2.02584	1.57655	0.449295	1.36537	0.732401
42	Turmor 1	22.9081		20.8335
43	Turmor 2	22.3608	22.3745	19.025	19.0886	3.28592	1.57655	1.70937	3.27018	0.305794
44	Turmor 2	22.3883		19.1522
45	Turmor 3	18.8467	18.9266	16.8796	16.7105	2.21607	1.57655	0.639526	1.55782	0.641924
46	Turmor 3	19.0064		16.5414
47	Turmor 4	21.1857	21.299	19.9764	20.0118	1.28717	1.57655	-0.28938	0.818254	1.22212
48	Turmor 4	21.4123		20.0472
49	Turmor 5	19.009	18.8251	19.2183	19.3607	-0.535611	1.57655	-2.11216	0.231301	4.32337
50	Turmor 5	18.6413		19.5031
51	Turmor 6	18.5185	18.778	16.1794	16.1985	2.57955	1.57655	1.00301	2.00417	0.49896
52	Turmor 6	19.0375		16.2175
53	Turmor 7	20.8517	20.8856	19.9506	19.7247	1.16087	1.57655	-0.415672	0.74967	1.33392
54	Turmor 7	20.9195		19.4988
55	Turmor 8	20.7341	20.8606	18.8633	18.8814	1.97921	1.57655	0.402658	1.32194	0.756463
56	Turmor 8	20.987		18.8995
57	Turmor 9	21.9967	22.0493	19.7004	19.7797	2.26952	1.57655	0.692978	1.61662	0.618576
58	Turmor 9	22.1019		19.8591
59	Turmor 10	22.9231	23.0584	20.6214	20.7176	2.34083	1.57655	0.764287	1.69853	0.588744
60	Turmor 10	23.1938		20.8138
61	Turmor 11	23.1851	23.2366	20.5175	20.173	3.06366	1.57655	1.48712	2.80328	0.356725
62	Turmor 11	23.2881		19.8284
63	Turmor 12	22.0813	22.2093	20.4514	20.5451	1.66421	1.57655	0.0876637	1.06265	0.941045
64	Turmor 12	22.3373		20.6387
65	Turmor 13	20.9453	21.0285	19.7658	19.9008	1.12767	1.57655	-0.448881	0.732611	1.36498
66	Turmor 13	21.1116		20.0358
67	Turmor 14	21.3369	21.3962	16.1115	16.1446	5.25156	1.57655	3.67501	12.7729	0.0782909
68	Turmor 14	21.4554		16.1778
69	Turmor 15	19.3021	19.4552	19.7612	19.7755	-0.32028	1.57655	-1.89683	0.268533	3.72393
70	Turmor 15	19.6084		19.7899
71	Turmor 16	22.6814	22.7854	21.6085	21.5996	1.18585	1.57655	-0.390695	0.762762	1.31102
72	Turmor 16	22.8895		21.5907
73	Turmor 17	22.5705	22.5617	19.9365	19.8824	2.67931	1.57655	1.10276	2.14765	0.465625
74	Turmor 17	22.553		19.8284
75	Turmor 18	20.4217	20.5161	14.944	14.8631	5.65306	1.57655	4.07651	16.8714	0.0592718
76	Turmor 18	20.6105		14.7821
77	Turmor 19	20.0218	20.0197	19.2542	19.327	0.692638	1.57655	-0.883908	0.541897	1.84537
78	Turmor 19	20.0175		19.3998
79	Turmor 20	20.0011	20.104	19.3913	19.55	0.554056	1.57655	-1.02249	0.492266	2.03142
80	Turmor 20	20.207		19.7087

## Sheet: RHOC
Table SV, Real Time PCR LGALS1, ITGA4, HGF and RHOC
Sample no.	Sample name	Ct value of the RHOC gene	Mean gene Ct value	Ct value of GAPDH internal reference gene	Mean Ct value of internal reference gene	Ct value of target gene - Ct value of internal reference gene	Ct value of target gene in control sample - Ct value of reference gene in control sample	(Ct value of the target gene in the sample to be tested - Ct value of the reference gene in the sample to be tested) - (Ct value of the target gene in the control sample - Ct value of the reference gene in the control sample)	2△△Ct	2-△△Ct		Sample	Normal	Turmor
1	Normal 1	22.7574	22.8496	18.5533	18.4009	4.44868	4.44868	0	1	1		1	1	0.522971		Key
2	Normal 1	22.9418		18.2485								2	1.13783	0.689018		large number
3	Normal 2	22.7088	22.7893	18.5531	18.5269	4.2624	4.44868	-0.186286	0.878865	1.13783		3	0.89643	0.502274
4	Normal 2	22.8699		18.5007								4	0.963027	0.607122		small number
5	Normal 3	22.6448	22.615	18.0022	18.0085	4.60642	4.44868	0.157737	1.11554	0.89643		5	0.812346	0.175531
6	Normal 3	22.5852		18.0149								6	1.07162	0.0776527
7	Normal 4	22.9341	22.783	18.2725	18.28	4.50304	4.44868	0.0543518	1.03839	0.963027		7	0.977107	1.06635
8	Normal 4	22.6319		18.2874								8	0.499007	0.820306
9	Normal 5	22.7951	22.9214	18.2407	18.1729	4.74852	4.44868	0.299834	1.231	0.812346		9	1.60941	0.590511
10	Normal 5	23.0478		18.1051								10	0.856585	0.77879
11	Normal 6	22.5117	22.5743	18.2265	18.2254	4.34889	4.44868	-0.0997992	0.933163	1.07162		11	1.04919	0.333549
12	Normal 6	22.6369		18.2244								12	1.21306	1.53336
13	Normal 7	22.8981	23.0401	18.6803	18.558	4.4821	4.44868	0.033411	1.02343	0.977107		13	0.797399	0.273841
14	Normal 7	23.1821		18.4356								14	1.36665	0.163385
15	Normal 8	23.7296	23.8467	18.3224	18.3952	5.45155	4.44868	1.00287	2.00398	0.499007		15	0.702415	0.168004
16	Normal 8	23.9639		18.468								16	1.2867	0.228433
17	Normal 9	21.8737	21.9178	18.0769	18.1556	3.76216	4.44868	-0.686529	0.621347	1.60941		17	0.817926	1.21975
18	Normal 9	21.9618		18.2344								18	0.647195	0.0898429
19	Normal 10	23.4106	23.6439	18.9841	18.9719	4.67202	4.44868	0.223332	1.16743	0.856585		19	0.885387	0.748429
20	Normal 10	23.8772		18.9596								20	1.28967	0.98569
21	Normal 11	22.9972	22.954	18.7188	18.5746	4.37941	4.44868	-0.0692778	0.953115	1.04919		Average	0.993948	0.57874
22	Normal 11	22.9108		18.4304								Standard deviation	0.267825	0.406816
23	Normal 12	22.4367	22.6666	18.3608	18.4966	4.17004	4.44868	-0.278646	0.824364	1.21306
24	Normal 12	22.8966		18.6324
25	Normal 13	23.5224	23.5865	18.8469	18.8112	4.77531	4.44868	0.326626	1.25408	0.797399
26	Normal 13	23.6506		18.7756
27	Normal 14	22.1862	22.6605	18.5543	18.6625	3.99805	4.44868	-0.450639	0.731719	1.36665
28	Normal 14	23.1349		18.7707
29	Normal 15	23.9388	23.9928	19.0977	19.0345	4.95829	4.44868	0.509605	1.42366	0.702415
30	Normal 15	24.0468		18.9713
31	Normal 16	23.1163	23.2258	19.0656	19.1408	4.085	4.44868	-0.363681	0.777179	1.2867
32	Normal 16	23.3353		19.2161
33	Normal 17	23.976	23.9549	19.3486	19.2162	4.73864	4.44868	0.289957	1.2226	0.817926
34	Normal 17	23.9338		19.0839
35	Normal 18	23.5654	23.5561	18.4675	18.4797	5.07641	4.44868	0.627728	1.54513	0.647195
36	Normal 18	23.5467		18.4918
37	Normal 19	23.096	23.0965	18.5457	18.4722	4.6243	4.44868	0.175619	1.12945	0.885387
38	Normal 19	23.097		18.3986
39	Normal 20	22.4254	22.5128	18.3301	18.4311	4.08169	4.44868	-0.367	0.775393	1.28967
40	Normal 20	22.6002		18.5321
41	Turmor 1	26.1257	26.1177	20.634	20.7338	5.38388	4.44868	0.935197	1.91215	0.522971
42	Turmor 1	26.1097		20.8335
43	Turmor 2	24.1285	24.0747	19.025	19.0886	4.98607	4.44868	0.537387	1.45134	0.689018
44	Turmor 2	24.0209		19.1522
45	Turmor 3	22.1934	22.1526	16.8796	16.7105	5.44214	4.44868	0.993452	1.99094	0.502274
46	Turmor 3	22.1118		16.5414
47	Turmor 4	25.0488	25.1804	19.9764	20.0118	5.16863	4.44868	0.719942	1.64712	0.607122
48	Turmor 4	25.3121		20.0472
49	Turmor 5	26.5925	26.3196	19.2183	19.3607	6.95888	4.44868	2.5102	5.69699	0.175531
50	Turmor 5	26.0467		19.5031
51	Turmor 6	24.5925	24.334	16.1794	16.1985	8.1355	4.44868	3.68682	12.8779	0.0776527
52	Turmor 6	24.0754		16.2175
53	Turmor 7	24.1457	24.0807	19.9506	19.7247	4.356	4.44868	-0.0926809	0.937778	1.06635
54	Turmor 7	24.0157		19.4988
55	Turmor 8	23.7521	23.6158	18.8633	18.8814	4.73445	4.44868	0.285766	1.21906	0.820306
56	Turmor 8	23.4796		18.8995
57	Turmor 9	24.93	24.9884	19.7004	19.7797	5.20865	4.44868	0.759964	1.69345	0.590511
58	Turmor 9	25.0468		19.8591
59	Turmor 10	25.4753	25.527	20.6214	20.7176	4.80938	4.44868	0.360693	1.28404	0.77879
60	Turmor 10	25.5787		20.8138
61	Turmor 11	26.1251	26.2057	20.5175	20.173	6.03271	4.44868	1.58403	2.99806	0.333549
62	Turmor 11	26.2862		19.8284
63	Turmor 12	24.332	24.377	20.4514	20.5451	3.83199	4.44868	-0.616693	0.652164	1.53336
64	Turmor 12	24.4221		20.6387
65	Turmor 13	26.1873	26.2181	19.7658	19.9008	6.31727	4.44868	1.86859	3.65175	0.273841
66	Turmor 13	26.2489		20.0358
67	Turmor 14	23.1789	23.207	16.1115	16.1446	7.06234	4.44868	2.61365	6.12051	0.163385
68	Turmor 14	23.235		16.1778
69	Turmor 15	26.9662	26.7976	19.7612	19.7755	7.02212	4.44868	2.57343	5.95223	0.168004
70	Turmor 15	26.6291		19.7899
71	Turmor 16	27.9695	28.1784	21.6085	21.5996	6.57884	4.44868	2.13016	4.37765	0.228433
72	Turmor 16	28.3874		21.5907
73	Turmor 17	23.9668	24.0445	19.9365	19.8824	4.1621	4.44868	-0.28658	0.819843	1.21975
74	Turmor 17	24.1222		19.8284
75	Turmor 18	22.9812	22.7882	14.944	14.8631	7.92514	4.44868	3.47645	11.1305	0.0898429
76	Turmor 18	22.5952		14.7821
77	Turmor 19	24.0095	24.1938	19.2542	19.327	4.86675	4.44868	0.418063	1.33613	0.748429
78	Turmor 19	24.378		19.3998
79	Turmor 20	23.9157	24.0195	19.3913	19.55	4.46948	4.44868	0.0207939	1.01452	0.98569
80	Turmor 20	24.1232		19.7087
